# Supplementary material for: Web-based computer adaptive assessment of individual perceptions of job satisfaction for hospital workplace employees
Source: BMC Med Res Methodol. 2011 Apr 17;11:47. doi: 10.1186/1471-2288-11-47 (PMC3101159; doi:10.1186/1471-2288-11-47)
Supplement: Additional file 1 — Expected scores obtained by the Rasch model's probability theory. Excel-VBA program for randomly generating Rasch model's expected scores. [file 1471-2288-11-47-S1.XLS]

## Sheet: Frontpage
			The generation of response to fitting Rasch rating scale model
			When known delta(item difficulties), theta(person measures) and tau(threshod difficulties)
			Instruction to response generation
			By Smile Chien , Taiwan
			smile@mail.chimei.org.tw
		The security of the Excel file should be adjusted to the middle level
		a)option to Tool, Macro, Security and adjuste the security level to middle
		b) restart the Excel file to excecute the icon in the spreadsheet of Main
		1)Tool to generate response in cells of data sheet
		Procedure
		a) Prepare data for person measure in column A and item difficulties in row 1
		b) make shure the threshold number and step difficulties in A4 and C3:C6 if only 4 thresholds in existence
		c) data ready in spreadsheet of data, and confirm value in A4, C3:C6(eg,4 threshold),F3 and F4 in spreadsheet of Main
		d)Click on "Response generation" in Main
		e) Detail to see spreadsheet of formula2
		Linacre JM.(2007) How to Simulate Rasch Data.Rasch Measurement Transactions 21:3 p. 1125. retrieved from http://www.rasch.org/rmt/rmt213a.htm
		2)Tool to obtain the probability,variance and outfit MNSQ
		When provisional estimate of a person and item difficulties known:
		a)The probability for each category is stated in the spreadsheet of formula2 t
		b)The expected score for each item is stated as:
		ex = (0 ) * a0 / all_p + (1 ) * a1 / all_p + (2 ) * a2 / all_p + (3 ) * a3 / all_p + (4 ) * a4 / all_p
		c)The variance for each item is stated as:
		var = a0 / all_p * (0 - ex) ^ 2 + a1 / all_p * (1 - ex) ^ 2 + a2 / all_p * (2 - ex) ^ 2 + a3 / all_p * (3 - ex) ^ 2 + a4 / all_p * (4 - ex) ^ 2
		Zsquare = (obs. score- ex) ^ 2 /var
		for j=1 to item
		outfit = outfit + Zsquare(i)
		next j
		3)Tool to show Newton-Raphson Method, information and SE
		for Newton=1 to n
		for item=1 to already_item
		When we know the calculation of expected score, variance as shown in 3)Tool
		first_order = first_D + (obs. score- ex)
		second_order = second_D + var
		information = information + var
		next item
		SE = 1 / information^ 0.5
		Ability = Ability - first_order / second_order
		Convergency to a limit
		if abs(first_order / second_order)<.05 then exit for
		next Newton

## Sheet: fre
			skew_median	0.762986
			2.5% delta	0.532093
			97.5% delta	1.05884
			Kurtosis	-0.28474
			2.5% delta	-0.801297
			97.5% delta	0.500526

## Sheet: Main
item-length	person no.	step diff.						0		100	38
0	0	0				response						1	0.762986	0.532093	1.05884		-0.28474	-0.801297	0.500526
threshold		-0.86		Person=	75	76						2
2		0.86		Item=	25	26						1
				Minimum category		0						1
												1
												1
												2
												3
												3
Note 1(for example):												2
1>example0.txt in WINSTEPS examples									27	IV		1
2>Manu tools of WINSTEPS to click outputfiles and option (1)ifile;(2)pfile;(3)sfile												1
3>putting those three data regarding item overall difficulties,person measures and step difficulties(shown in C3:C4)												1
4>make sure that those values are correct in F3,F4, A4 and C3:C4												2
5>Click "response generation"												4
6> the so-called expected responses were generated in spreadsheet of data												4
Reference:												4
Chien TW, Lin SJ, Wang WC, Leung HW, Lai WP, Chan AL: Reliability of 95% confidence interval revealed by expected quality-of-life scores: an example of nasopharyngeal carcinoma patients after radiotherapy using EORTC QLQ-C 30.Health Qual Life Outcomes 2010,13;8:68.												3
Wang WC, Chen CT: Item parameter recovery, standard error estimates, adn fit statistics of the WINSTEPS program for the family of Rasch models. Educational and Psychological Measurement 2005; 65(3):376-404.												1
Linacre JM.(2007) How to Simulate Rasch Data.Rasch Measurement Transactions 21:3 p. 1125. retrieved from http://www.rasch.org/rmt/rmt213a.htm
Note 2:												2
To see the 2)Tool to plot skewness analysis in Frontpage												1
												2
												1
												1
												2
												2
												2
												2
												2
												2
												2
												3
												2
												2
												1
												2
												3
												4

## Sheet: data
MEASURE	-0.4	-0.71	0.42	1.75	2.42	0.31	1.1	1.67	0.71	-1.49	-0.96	-2.04	-1.29	0.42	-0.48	0.6	0.16	-3.15	-2.48	1.83	-0.85	0.08	2.18	-0.31	0.53
0.61	2	1	1	0	0	0	0	0	1	1	1	2	1	2	2	0	2	1	2	0	2	0	0	2	1
6.07	2	2	2	2	2	2	2	2	2	2	2	2	2	2	2	2	2	2	2	2	2	2	2	2	2
1.1	2	2	1	1	1	2	1	0	1	1	1	2	1	2	2	1	1	2	2	1	2	1	1	1	1
0.26	1	2	0	1	0	0	0	0	1	2	1	1	1	2	1	0	0	2	1	1	2	1	0	2	1
-0.67	0	1	0	0	0	0	1	0	0	1	1	2	2	0	2	0	1	2	2	0	1	1	1	0	0
-0.08	0	1	1	0	0	1	0	0	1	2	2	2	2	1	2	0	0	2	2	0	2	1	0	1	1
2.71	2	2	2	2	1	2	2	1	2	2	2	2	2	2	2	2	2	2	2	2	2	2	2	2	2
0.97	2	1	2	0	0	0	1	0	1	2	2	2	2	1	2	1	1	2	2	1	2	1	0	1	0
-0.08	1	2	1	0	0	1	0	1	1	2	2	2	1	0	2	1	1	2	2	0	1	1	0	1	2
0.38	2	2	1	0	0	1	0	1	0	2	1	2	2	0	2	0	0	2	2	0	1	1	1	2	0
1.23	1	2	2	1	1	1	1	0	1	1	2	2	1	1	1	0	1	2	2	1	2	1	2	1	2
-0.92	1	2	0	0	0	1	0	1	1	0	2	1	1	0	0	1	0	2	2	0	1	1	0	1	0
-0.08	1	2	0	0	0	1	0	0	1	2	2	2	1	0	1	2	1	2	1	1	2	1	0	1	2
-0.2	2	1	1	0	0	0	0	0	1	2	1	1	1	0	1	0	2	2	1	1	1	0	0	1	1
0.26	2	2	1	0	1	1	1	1	0	2	1	2	2	1	2	1	1	2	2	0	2	2	1	1	0
2.49	1	2	2	2	0	2	2	2	2	2	2	2	2	2	2	1	2	2	2	1	2	2	1	2	2
3.59	2	2	2	2	1	2	2	2	2	2	2	2	2	2	2	2	2	2	2	2	2	2	2	2	2
2.11	2	2	2	2	1	1	1	1	2	2	2	2	2	2	2	1	2	2	2	1	2	2	1	2	2
0.85	2	2	1	0	0	1	1	1	2	2	2	2	2	1	1	2	2	2	2	0	1	2	1	2	1
0.15	1	2	2	0	1	1	1	0	1	2	2	2	2	2	2	1	2	2	1	0	1	1	0	0	0
0.38	1	1	2	0	0	1	0	0	1	1	1	2	0	1	1	2	1	2	2	0	2	1	0	1	1
1.23	1	1	1	0	0	1	1	1	1	2	1	2	2	1	2	2	1	2	2	1	2	1	1	1	2
1.95	1	2	1	1	2	1	1	0	2	2	2	2	2	2	2	2	1	2	2	1	2	2	1	1	2
0.85	1	1	1	1	0	2	1	1	2	2	2	2	2	2	1	0	1	2	2	0	0	2	1	1	1
2.29	2	2	2	1	0	2	1	0	2	2	2	2	2	2	2	2	2	2	2	2	2	2	1	2	1
0.03	1	1	0	0	1	2	0	1	1	2	1	1	1	1	2	0	1	2	2	0	2	2	1	0	1
0.26	2	2	1	0	0	1	1	1	1	1	2	2	2	0	1	1	1	2	2	1	2	0	2	2	1
0.49	2	2	1	0	1	1	1	0	1	1	2	2	2	1	2	0	0	1	2	1	2	2	1	2	1
-1.32	0	2	0	0	0	1	1	0	0	1	1	1	1	1	1	0	1	2	2	0	2	2	0	0	0
-1.05	1	1	2	0	1	0	0	0	1	2	1	2	0	0	1	0	1	1	1	0	2	1	0	0	0
0.73	2	1	1	2	0	1	1	1	2	2	2	1	2	2	2	1	1	2	2	0	1	0	1	2	1
0.15	2	2	0	0	0	1	0	0	1	2	0	2	2	2	2	1	1	2	1	1	2	0	0	2	2
1.64	2	2	2	0	0	2	1	2	1	2	2	2	2	1	2	2	1	2	2	1	2	2	0	2	2
4.06	2	2	2	2	1	2	2	2	2	2	2	2	2	2	2	2	2	2	2	2	2	2	2	2	2
0.26	1	2	1	1	0	1	0	1	0	2	1	2	1	0	0	1	2	2	2	1	2	2	0	2	2
0.03	1	2	1	1	1	1	1	1	2	2	1	2	2	0	0	1	0	2	2	1	1	1	0	2	1
0.26	2	1	0	0	0	0	2	1	0	2	2	2	0	0	2	0	1	2	2	0	2	0	0	1	1
1.64	2	2	2	1	0	2	0	1	1	2	2	2	1	2	1	2	2	2	2	1	1	2	1	2	1
2.11	2	2	2	0	1	2	1	2	2	2	2	2	2	1	2	2	2	2	2	0	2	2	0	2	2
1.79	1	2	1	0	1	1	1	0	2	2	2	2	1	1	2	2	2	2	2	2	1	2	1	2	2
4.82	2	2	2	2	2	2	2	2	2	2	2	2	2	2	2	2	2	2	2	1	2	2	2	2	2
0.85	1	2	1	0	0	1	1	1	1	2	2	1	1	1	2	1	1	2	2	0	2	1	0	2	1
1.5	1	1	1	1	1	2	1	1	1	2	2	2	2	2	2	2	2	2	2	1	2	2	2	2	2
0.38	0	0	1	0	0	1	1	1	1	0	2	2	1	1	2	2	1	2	2	0	2	2	0	1	1
2.95	2	2	2	2	1	2	2	1	2	2	2	2	2	2	2	2	2	2	2	2	2	2	1	2	2
0.15	1	2	2	0	0	0	0	2	2	1	2	2	2	0	1	0	1	2	2	1	2	0	0	1	2
-0.08	1	1	1	1	1	1	0	0	1	2	1	2	2	0	1	2	2	2	2	1	2	1	0	1	0
2.49	2	2	2	1	1	2	1	2	2	2	2	2	2	1	2	1	2	2	2	1	1	2	1	2	2
-0.43	2	2	0	0	0	1	1	0	1	2	1	2	2	0	1	2	0	2	1	0	1	1	1	2	2
3.24	2	2	2	2	1	2	2	2	2	2	2	2	2	2	2	2	2	2	2	1	2	2	1	2	2
1.1	2	2	1	1	0	2	1	0	2	2	2	2	2	2	1	1	1	2	2	1	1	2	1	1	1
0.26	2	2	1	0	0	1	1	0	0	2	2	2	2	0	2	1	1	2	2	0	2	1	1	1	1
-1.61	0	1	1	0	0	1	0	1	0	1	0	1	0	0	0	0	0	1	1	0	1	0	0	1	0
0.61	2	2	2	0	0	1	2	1	0	2	2	2	1	1	1	2	1	2	2	1	0	1	0	1	0
0.03	1	1	0	0	1	0	0	1	1	2	2	1	2	1	1	0	2	2	2	0	2	1	2	2	1
1.95	2	2	1	1	0	1	1	2	1	2	1	2	2	2	2	1	1	2	2	1	2	2	1	2	2
1.95	2	2	2	2	1	2	0	1	2	2	2	2	2	2	2	2	2	2	2	1	2	1	1	1	1
1.23	1	1	2	0	1	1	2	2	1	2	2	2	2	1	2	1	1	2	2	0	2	1	0	1	1
2.29	2	2	2	1	1	2	2	1	2	2	2	2	2	1	2	2	2	2	2	1	2	2	0	2	2
1.36	2	2	1	0	1	2	1	1	2	2	2	2	2	1	2	1	2	2	2	2	2	1	1	1	1
0.49	2	2	1	0	0	1	0	0	1	1	2	2	1	1	1	1	2	2	2	0	2	1	1	0	2
0.38	1	2	1	0	0	2	0	0	1	2	2	2	2	2	2	0	0	2	2	1	2	2	1	1	2
1.1	2	1	1	1	0	2	1	0	1	2	2	2	2	1	2	2	1	2	2	1	2	2	1	2	2
1.36	2	2	2	0	2	2	2	0	1	2	2	2	2	1	2	2	2	2	2	0	2	1	1	1	2
0.73	2	1	0	1	0	1	1	1	1	2	2	2	2	0	2	0	1	2	2	0	2	1	0	1	2
0.61	1	1	1	1	0	2	1	1	1	2	2	1	2	0	2	1	1	2	2	0	1	1	0	2	1
0.49	1	2	1	1	1	0	1	1	1	2	2	1	2	2	1	1	0	2	2	1	2	2	1	2	2
-0.67	0	1	2	1	0	0	0	0	0	2	1	1	0	0	1	0	1	2	1	0	2	1	0	0	0
0.97	0	2	1	1	0	1	0	0	1	2	2	2	1	1	2	1	1	2	2	0	2	1	1	1	1
1.79	1	2	2	1	1	2	1	1	2	2	2	1	2	2	2	2	1	2	2	1	2	2	0	2	2
0.97	2	1	1	1	0	1	1	0	2	2	2	2	2	1	2	2	1	2	2	1	1	2	0	2	2
-1.32	1	0	1	1	0	0	1	0	0	1	1	2	1	0	1	0	0	2	2	1	1	0	0	1	1
0.38	0	2	2	0	0	1	1	1	1	2	2	1	2	1	2	1	1	2	2	0	2	2	0	1	0
1.5	1	2	2	0	1	2	1	1	0	2	1	2	1	2	2	1	1	2	2	1	2	2	1	2	0
0.15	1	2	1	0	0	1	1	0	0	1	2	2	2	0	1	0	2	2	2	0	0	2	1	0	2
